# Supplementary material for: Application of a Hygroscopicity Tandem Differential MobilityAnalyzer for characterizing PM Emissions in exhaust plumes from anAircraft Engine burning Conventional and Alternative fuels
Source: Copernicus journal article supplement (doi:10.5194/acp-2018-507), 2018-06-05
Supplement: Supplementary file [file acp-2018-507-RC3-supplement.pdf]

Journal: ACP

Title: Application of a Hygroscopicity-Tandem Differential Mobility Analyzer for characterizing PM Emissions in exhaust plumes from an Aircraft Engine burning Conventional and Alternative fuels

Author(s): Max B. Trueblood et al.

MS No.: acp-2018-507

MS Type: Research article

The authors describe well their analyzer system and pertinent application results. The aerosol hydroscopic property measurements are relevant, especially with the inclusion and comparison for alternative fuels. I highly recommend the paper for publication. I offer the following suggested edits and comments:

| Page # | Line #     | Suggested Edits or Comments                                                                                                                                                  |
|--------|------------|------------------------------------------------------------------------------------------------------------------------------------------------------------------------------|
| 1      | 20         | Replace "fuels" with "types of fuel"                                                                                                                                         |
| 1      | 23         | "decreased" is spelled incorrectly                                                                                                                                           |
| 2      | 3          | Change "on" to "onto"                                                                                                                                                        |
| 2      | 16         | Place a comma after "plume"                                                                                                                                                  |
| 2      | 31         | Change "45s" to "45 s" or better, change to "45 seconds"                                                                                                                     |
| 3      | 7          | "an ice bath to dry the sample" ... is not fully unclear. Please elaborate.                                                                                                  |
| 3      | 14         | Change "poly-dispersed aerosol was classified" to "poly-dispersed aerosol was classified by size"                                                                            |
| 3      | 16         | Throughout the paper, the tense switches from "was" to "is". I am not sure the change is always correct. Maybe an expert in grammar should review and make suggestions.      |
| 3      | 17-18      | The word "now" is not necessary and should not be used in this manner in a formal paper.                                                                                     |
| 3      | 20         | Suggest that "Valves V2 and V3 can direct ..." be changed to "Valves V2 and V3 are used to ..."                                                                              |
| 3      | 21         | Suggest that "Valves V4 and V5 achieve ..." be changed to "Valves V2 and V3 are used to achieve ..."                                                                         |
| 3      | 25, 26, 28 | I consulted with colleagues and we are not familiar with the use of the term "thermostat" being used as a verb. Suggest not using the term "thermostated" in a formal paper. |
| 4      | 5          | Add comma after "frequency"                                                                                                                                                  |
| 4      | 6          | Change "it(1)" to "it (1)"                                                                                                                                                   |
| 4      | 31         | Add comma after "Thus"                                                                                                                                                       |
| 5      | 1          | The word "very" should not be used in a formal paper.                                                                                                                        |
| 6      | 2          | Suggest using a simpler Fig. 1 title with this long explanation in the body text.                                                                                            |
| 6      | 6          | "discuss" should be "discusses"                                                                                                                                              |
| 6      | 9          | Change "deliver a given diameter Xd particle" to "deliver sample with a given diameter Xd particles"                                                                         |
| 6      | 10         | "initiates voltage sweep" should be "initiates a voltage sweep"                                                                                                              |
| 7      | 11-12      | Change "... this calibration is then later utilized ..." to "... this calibration is utilized"                                                                               |
| 7      | 7          | Change "when it is exposed ..." to "... when exposed ..."                                                                                                                    |
| 15     | 4          | Change "will be" to "are"                                                                                                                                                    |

|    |    |                                                                                                                                                                                                                                            |
|----|----|--------------------------------------------------------------------------------------------------------------------------------------------------------------------------------------------------------------------------------------------|
| 15 | 22 | Change "20nm" to "20 nm"                                                                                                                                                                                                                   |
| 15 | 28 | Change "an existing soot particle to form a hybrid particle that subsequently has a significant water soluble component" to "existing soot particles to form hybrid particles that subsequently have significant water soluble components" |
| 16 | 15 | Change "This data is" to "These data are" [Throughout my career, my technical editing staff have required "data" to be treated as plural, regardless of the use.                                                                           |
| 18 | 13 | Change "plots the GF" to "plots, the GF" or, better, combine with the previous sentence using "where"                                                                                                                                      |
| 18 | 14 | Add comma, change "(FT plus THT) the GF is" to "(FT plus THT), the GF is"                                                                                                                                                                  |
| 20 | 1  | Add colon, change "These findings are (1)" to " These findings are: (1)"                                                                                                                                                                   |
|    |    |                                                                                                                                                                                                                                            |
